# Supplementary material for: Microdomain formation is a general property of bacterial membrane proteins and induces heterogeneity of diffusion patterns
Source: PubMed Central journal article supplement (PMC6120080; doi:10.1186/s12915-018-0561-0), 2018-09-03

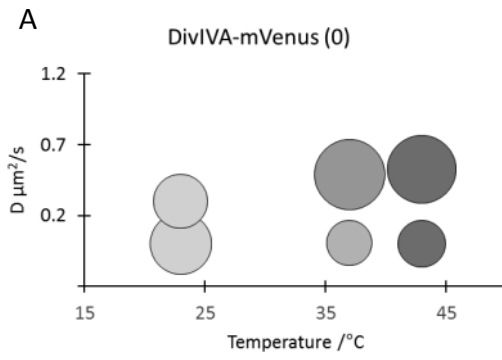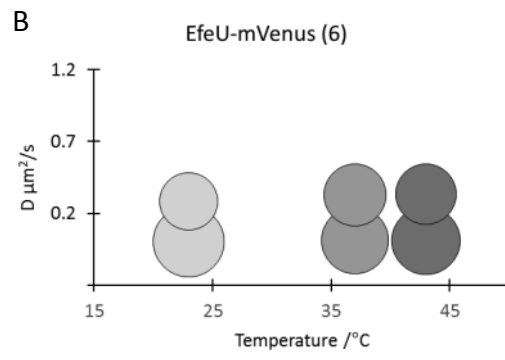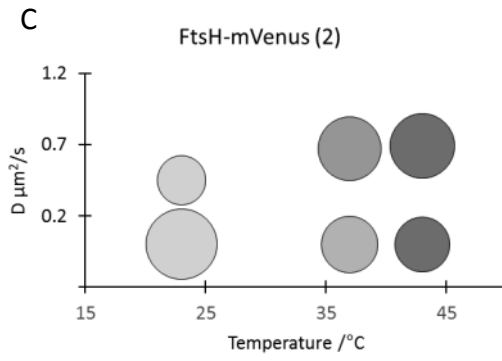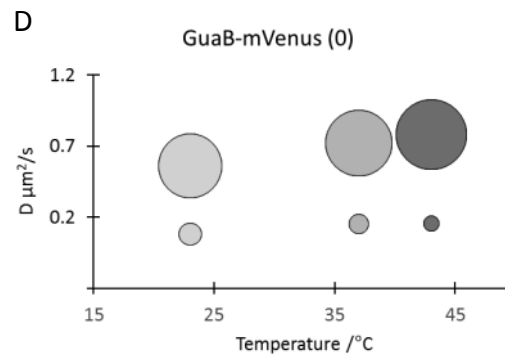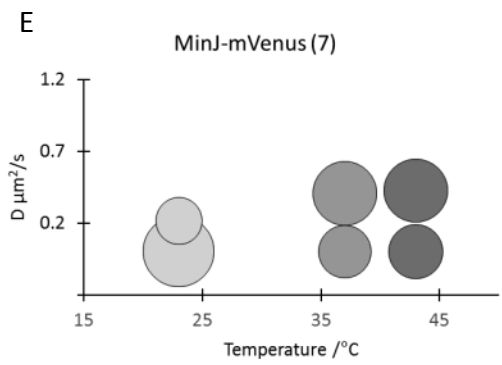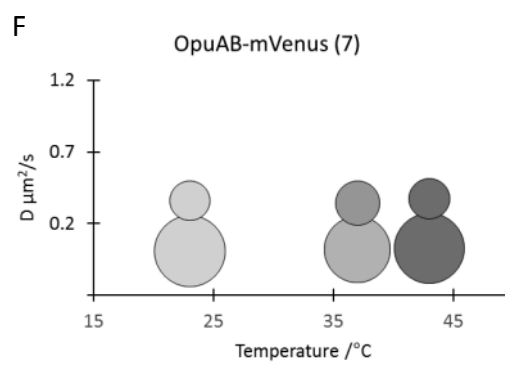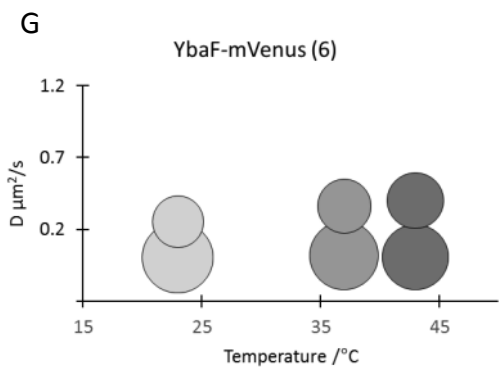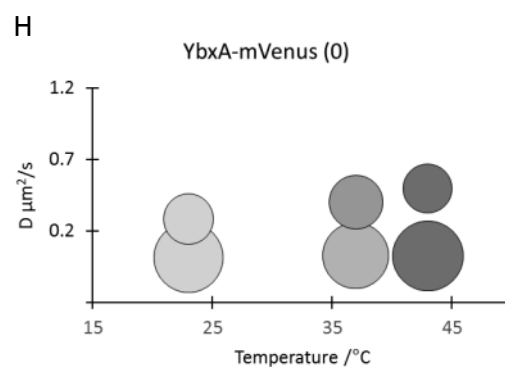

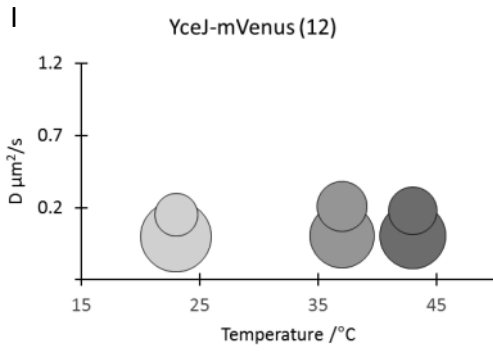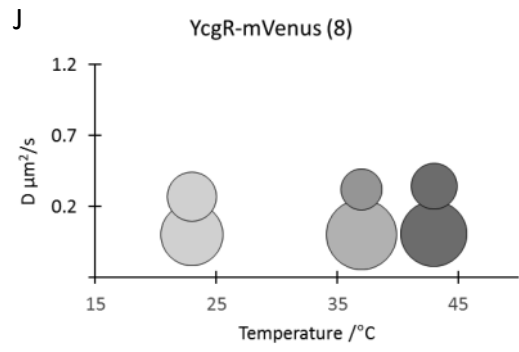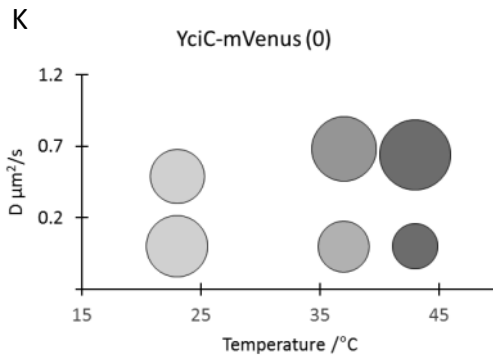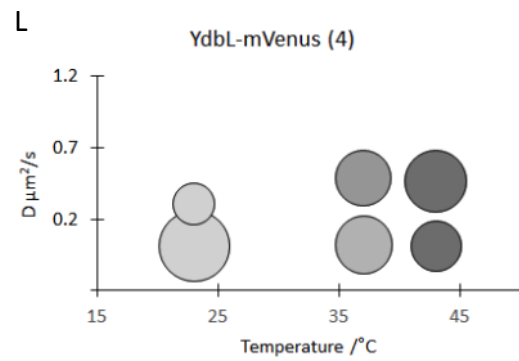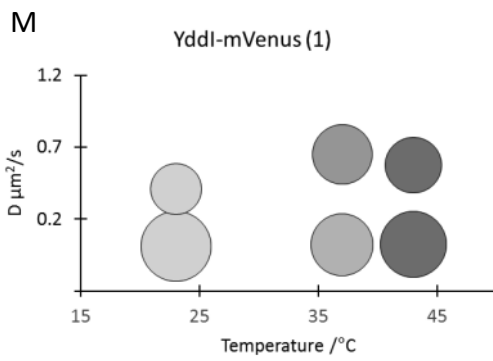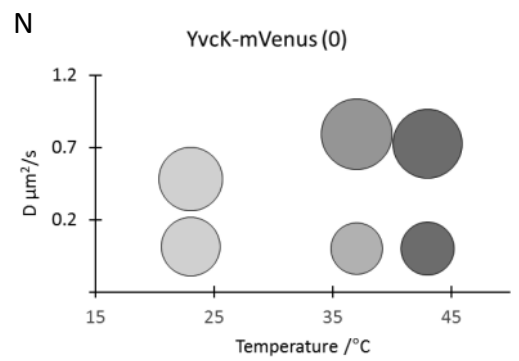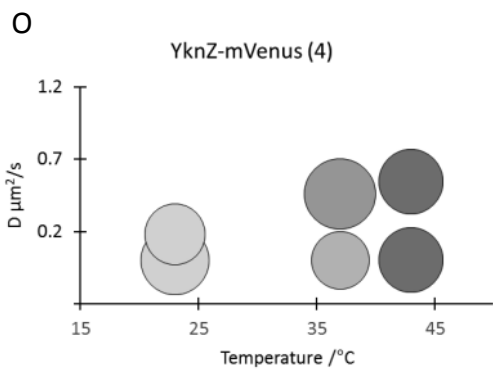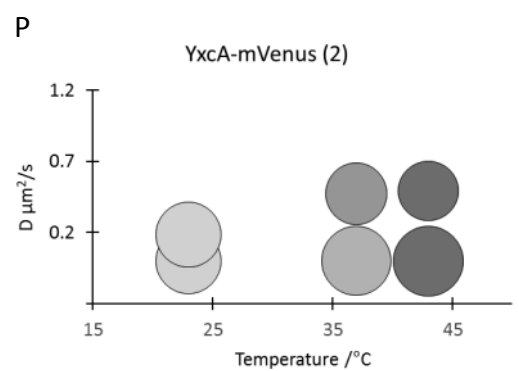

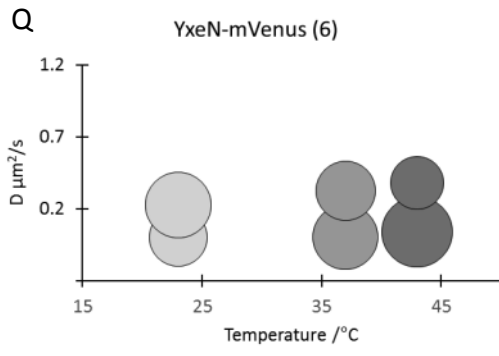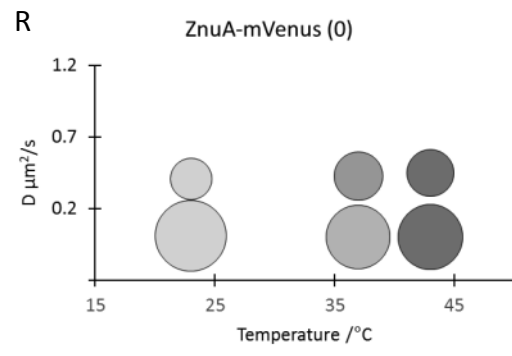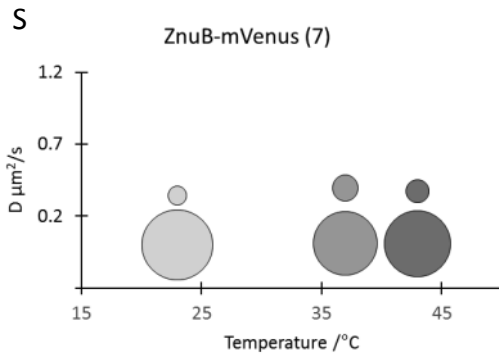

Supplement: 12915_2018_561_MOESM8_ESM.pdf [file 12915_2018_561_MOESM8_ESM.pdf]
